# Supplementary material for: Breeding Approaches for Controlled Conditions of Artificial Light Culture for Small Radish and Radish (Raphanus sativus L.)
Source: MDPI journal article supplement (doi:10.3390/horticulturae9060678), 2023-06-08
Supplement: s1 [file s1]

Table S1. Evaluation of radish accessions by morphological characteristics and productivity when growing under controlled conditions of artificial light.

| Accession number | Catalog number | Accession                | Origin  | Type                      | Rosette Height, cm | Rosette Diameter, cm | Leaf Length, cm | Leaf Width, cm | Root Length, cm | Root Diameter, cm | Root Index (Length/Diameter) | Plant Weight, g | Root Weight, g | Productivity, kg/m <sup>2</sup> | Duration of Vegetative Phase, Days | Number of bolted plants, % | Degree of pubescence, score |
|------------------|----------------|--------------------------|---------|---------------------------|--------------------|----------------------|-----------------|----------------|-----------------|-------------------|------------------------------|-----------------|----------------|---------------------------------|------------------------------------|----------------------------|-----------------------------|
|                  |                | Small radish             |         |                           |                    |                      |                 |                |                 |                   |                              |                 |                |                                 |                                    |                            |                             |
| 1                | 1233           | Dunganskiy               | China   | Red Giant                 | 27.2               | 17.4                 | 14.2            | 8.3            | 7.1             | 2.4               | 3.0                          | 45.1            | 27.3           | 2.6                             | 32.8                               | 0.0                        | 1*                          |
| 2                | 1543           | Rose red with white tip  | Russia  | Pink-red with a White Tip | 20.5               | 16.4                 | 10.5            | 6.2            | 3.3             | 2.9               | 1.2                          | 32.1            | 16.3           | 2.0                             | 21.0                               | 38.0                       | 2                           |
| 3                | 1545           | Ispanskiy                | Russia  | Saxa                      | 19.3               | 14.4                 | 11.6            | 7.3            | 4.0             | 2.9               | 1.4                          | 28.4            | 21.4           | 3.5                             | 19.8                               | 6.5                        | 1                           |
| 4                | 1546           | Moskovskiy parovoy       | Russia  | White Icicle              | 22.7               | 19.9                 | 12.6            | 7.2            | 9.8             | 1.9               | 5.1                          | 48.7            | 20.3           | 2.5                             | 25.3                               | 0.0                        | 1                           |
| 5                | 1566           | Ranniy sharlakhovyy      | USA     | Saxa                      | 15.2               | 15.8                 | 10.1            | 5.5            | 4.1             | 2.9               | 1.4                          | 28.5            | 18.1           | 2.7                             | 21.5                               | 0.0                        | 2                           |
| 6                | 1666           | Virovskiy white          | Russia  | Burpee's white            | 22.1               | 17.4                 | 12.5            | 8.0            | 5.1             | 3.4               | 1.5                          | 56.4            | 36.5           | 3.0                             | 33.3                               | 0.0                        | 0                           |
| 7                | 1667           | Red giant                | Russia  | Red Giant                 | 24.9               | 19.8                 | 14.6            | 7.9            | 6.4             | 2.5               | 2.6                          | 53.0            | 19.6           | 1.7                             | 33.5                               | 0.0                        | 0                           |
| 8                | 1705           | Jigscap                  | Hungary | White Icicle              | 26.8               | 18.3                 | 17.4            | 9.6            | 6.2             | 1.3               | 4.8                          | 55.8            | 9.7            | 0.4                             | 33.5                               | 0.0                        | 1                           |
| 9                | 1742           | Dreienbrunnen            | Germany | Saxa                      | 18.6               | 18.1                 | 11.2            | 7.1            | 3.7             | 2.7               | 1.4                          | 28.5            | 17.4           | 2.8                             | 18.5                               | 8.5                        | 2                           |
| 10               | 1762           | Ohlsens Enke Halflong    | Denmark | French Breakfast          | 17.8               | 15.1                 | 9.6             | 5.6            | 4.2             | 2.6               | 1.6                          | 26.4            | 23.4           | 4.2                             | 20.5                               | 0.0                        | 2                           |
| 11               | 1826           | Rund rosenrod vetspetsig | Sweden  | Pink-red with a White Tip | 23.7               | 16.9                 | 14.3            | 8.7            | 5.4             | 2.2               | 2.5                          | 27.9            | 11.5           | 1.6                             | 31.0                               | 0.0                        | 2                           |
| 12               | 1858           | Early Scarlet Globe      | USA     | Scarlet globe             | 18.1               | 12.2                 | 9.5             | 6.5            | 2.9             | 2.3               | 1.3                          | 15.6            | 6.6            | 1.1                             | 20.5                               | 0.0                        | 2                           |
| 13               | 1879           | Long scarlet             | India   | Red Giant                 | 27.1               | 18.9                 | 15.5            | 8.4            | 11.3            | 1.5               | 7.5                          | 50.2            | 22.0           | 1.5                             | 32.5                               | 33.5                       | 1                           |
| 14               | 1921           | White round              | China   | Burpee's white            | 21.4               | 14.3                 | 12.7            | 7.9            | 3.5             | 2.8               | 1.2                          | 33.0            | 18.3           | 2.4                             | 32.5                               | 0.0                        | 0                           |
| 15               | 1923           | Local white              | China   | Burpee's white            | 21.5               | 16.6                 | 12.9            | 8.1            | 5.4             | 2.8               | 1.9                          | 47.4            | 26.0           | 3.9                             | 32.5                               | 0.0                        | 0                           |
| 16               | 1933           | Icicle                   | Canada  | White Icicle              | 21.9               | 18.5                 | 11.1            | 6.6            | 7.0             | 1.5               | 4.8                          | 26.1            | 11.1           | 1.0                             | 25.5                               | 0.0                        | 1                           |

|    |      |                          |             |                           |      |      |      |     |     |     |     |      |      |     |      |       |   |
|----|------|--------------------------|-------------|---------------------------|------|------|------|-----|-----|-----|-----|------|------|-----|------|-------|---|
| 17 | 1936 | Early Comet              | Canada      | Scarlet globe             | 16.1 | 13.4 | 9.6  | 5.5 | 4.1 | 2.1 | 2.0 | 17.1 | 10.8 | 1.7 | 20.5 | 0.0   | 2 |
| 18 | 1939 | French Breakfast         | Pakistan    | French Breakfast          | 16.3 | 13.9 | 11.3 | 6.1 | 4.1 | 1.9 | 2.1 | 19.8 | 13.8 | 2.3 | 23.5 | 25.0  | 3 |
| 19 | 1941 | Cavalier bright scarlet  | Canada      | Scarlet globe             | 15.2 | 13.0 | 9.4  | 5.5 | 3.9 | 2.5 | 1.6 | 18.6 | 11.6 | 1.2 | 21.5 | 5.0   | 2 |
| 20 | 1946 | Darozi surx              | Tajikistan  | Red Giant                 | 24.8 | 18.1 | 15.1 | 8.2 | 7.9 | 2.3 | 3.4 | 40.2 | 21.2 | 2.3 | 33.5 | 0.0   | 0 |
| 21 | 2010 | Round Red white Tip      | Denmark     | Pink-red with a White Tip | 21.5 | 13.8 | 12.0 | 7.2 | 3.1 | 2.9 | 1.1 | 27.6 | 13.4 | 0.8 | 20.5 | 17.3  | 2 |
| 22 | 2019 | Early scarlet turnip     | USA         | Pink-red with a White Tip | 22.9 | 14.2 | 12.4 | 9.1 | 5.7 | 2.7 | 2.1 | 56.4 | 18.1 | 2.9 | 20.5 | 20.0  | 1 |
| 23 | 2027 | Roem van Zwijndrecht     | Netherlands | Saxa                      | 22.6 | 17.7 | 13.2 | 7.9 | 4.1 | 2.9 | 1.4 | 28.5 | 13.3 | 1.6 | 28.0 | 0.0   | 2 |
| 24 | 2057 | № 128                    | Mongolia    | Burpee's white            | 24.4 | 18.3 | 15.4 | 8.1 | 4.2 | 2.8 | 1.5 | 28.9 | 14.4 | 1.5 | 28.0 | 30.0  | 2 |
| 25 | 2083 | Saxa                     | Chile       | Saxa                      | 15.6 | 14.9 | 8.8  | 5.4 | 2.9 | 2.6 | 1.1 | 15.3 | 10.5 | 1.2 | 22.5 | 25.0  | 1 |
| 26 | 2086 | Perondo punta blanca     | Chile       | Pink-red with a White Tip | 19.9 | 12.9 | 10.1 | 6.6 | 3.2 | 2.4 | 1.3 | 21.3 | 11.7 | 1.4 | 20.5 | 22.0  | 2 |
| 27 | 2087 | White Icicle             | Chile       | White Icicle              | 24.5 | 17.1 | 12.7 | 8.0 | 8.9 | 2.1 | 4.3 | 49.2 | 27.9 | 2.4 | 25.5 | 15.0  | 1 |
| 28 | 2097 | Scarlet turnip white tip | Chile       | Pink-red with a White Tip | 20.6 | 13.7 | 11.2 | 7.0 | 3.8 | 2.5 | 1.5 | 29.5 | 20.2 | 2.8 | 20.5 | 13.0  | 2 |
| 29 | 2106 | White Globe Hailstone    | Chile       | Hailstone                 | 24.1 | 15.4 | 12.5 | 8.6 | 5.7 | 2.7 | 2.1 | 45.7 | 21.2 | 2.1 | 24.5 | 100.0 | 3 |
| 30 | 2111 | Champion                 | Chile       | Saxa                      | 18.1 | 13.4 | 12.2 | 8.1 | 3.7 | 3.0 | 1.2 | 29.2 | 17.7 | 2.9 | 20.5 | 10.0  | 2 |
| 31 | 2120 | Local                    | Turkey      | Saxa                      | 16.7 | 14.6 | 10.1 | 6.2 | 3.3 | 3.0 | 1.1 | 27.5 | 18.6 | 3.4 | 20.5 | 48.0  | 2 |
| 32 | 2122 | IstapN 1687              | Turkey      | White Icicle              | 19.6 | 17.4 | 11.7 | 7.5 | 7.5 | 1.9 | 4.0 | 29.6 | 17.1 | 2.6 | 25.5 | 5.0   | 2 |
| 33 | 2127 | Rosso Quarantino         | Italy       | Saxa                      | 17.8 | 12.5 | 11.3 | 7.1 | 3.6 | 3.1 | 1.2 | 29.7 | 16.9 | 3.2 | 20.5 | 0.0   | 2 |
| 34 | 2130 | Local                    | Azerbaijan  | Pink-red with a White Tip | 21.3 | 16.1 | 12.3 | 7.1 | 3.4 | 3.1 | 1.1 | 38.2 | 26.1 | 4.0 | 20.5 | 48.0  | 2 |
| 35 | 2133 | Cherry Belle             | Tanzania    | Saxa                      | 13.7 | 12.9 | 8.9  | 5.0 | 3.3 | 2.6 | 1.3 | 17.4 | 13.9 | 2.5 | 20.5 | 0.0   | 2 |
| 36 | 2136 | Balady                   | Hungary     | White Icicle              | 21.6 | 19.1 | 13.1 | 8.1 | 7.9 | 2.1 | 3.8 | 46.4 | 26.1 | 3.6 | 25.5 | 10.0  | 1 |

|    |      |                                        |             |                           |      |      |      |     |     |     |     |      |      |     |      |      |   |
|----|------|----------------------------------------|-------------|---------------------------|------|------|------|-----|-----|-----|-----|------|------|-----|------|------|---|
| 37 | 2141 | Local                                  | Iran        | Würzburg                  | 16.8 | 16.2 | 10.2 | 6.7 | 2.7 | 2.6 | 1.0 | 25.3 | 15.9 | 2.1 | 23.5 | 10.0 | 1 |
| 38 | 2154 | Saxa 455 Extra chort Top Osená         | Denmark     | Saxa                      | 16.9 | 10.9 | 9.4  | 5.9 | 3.6 | 3.0 | 1.2 | 22.7 | 15.9 | 3.0 | 20.5 | 0.0  | 3 |
| 39 | 2156 | National rond rose about blanc         | Algeria     | Pink-red with a White Tip | 15.6 | 15.0 | 9.9  | 5.2 | 2.6 | 2.3 | 1.1 | 13.6 | 6.8  | 0.7 | 20.5 | 0.0  | 2 |
| 40 | 2165 | Novi red Sel                           | Netherlands | Saxa                      | 20.0 | 16.4 | 11.3 | 6.2 | 3.1 | 2.9 | 1.1 | 24.7 | 15.0 | 1.8 | 20.5 | 12.0 | 2 |
| 41 | 2166 | Neoro                                  | Netherlands | Saxa                      | 15.9 | 12.9 | 11.7 | 7.7 | 3.6 | 2.9 | 1.2 | 32.8 | 19.1 | 3.2 | 20.5 | 12.0 | 1 |
| 42 | 2167 | KD                                     | Netherlands | Saxa                      | 16.0 | 14.6 | 11.8 | 7.5 | 4.1 | 3.3 | 1.3 | 27.6 | 20.6 | 3.8 | 20.5 | 0.0  | 2 |
| 43 | 2168 | Gaudry                                 | Netherlands | Pink-red with a White Tip | 23.6 | 14.5 | 11.5 | 7.1 | 3.6 | 3.3 | 1.1 | 32.6 | 14.9 | 2.2 | 20.5 | 14.0 | 3 |
| 44 | 2170 | Early red                              | Russia      | Saxa                      | 19.4 | 13.5 | 10.9 | 7.5 | 3.3 | 2.8 | 1.2 | 27.0 | 15.1 | 2.4 | 20.5 | 14.0 | 2 |
| 45 | 2175 | Pernot OJO/52                          | Sweden      | French Breakfast          | 16.6 | 14.6 | 9.9  | 5.7 | 5.7 | 1.8 | 3.2 | 17.7 | 10.3 | 1.6 | 20.5 | 10.0 | 1 |
| 46 | 2176 | Delikat                                | Sweden      | French Breakfast          | 21.7 | 14.4 | 11.2 | 8.4 | 5.9 | 2.3 | 2.6 | 34.5 | 18.1 | 3.3 | 20.5 | 0.0  | 1 |
| 47 | 2185 | Ognista kula                           | Poland      | Saxa                      | 16.1 | 11.9 | 9.4  | 5.8 | 2.9 | 2.3 | 1.3 | 12.5 | 7.1  | 0.7 | 20.5 | 0.0  | 2 |
| 48 | 2187 | Local                                  | Azerbaijan  | Red Giant                 | 24.7 | 17.2 | 14.1 | 7.8 | 4.4 | 2.3 | 1.9 | 39.1 | 11.6 | 0.7 | 33.5 | 0.0  | 0 |
| 49 | 2188 | Candela di ghiaccio                    | Italy       | White Icicle              | 24.1 | 16.5 | 12.1 | 7.6 | 7.4 | 1.8 | 4.1 | 34.1 | 20.1 | 0.9 | 25.5 | 38.0 | 0 |
| 50 | 2192 | Vetomag                                | Hungary     | Saxa                      | 15.6 | 11.4 | 9.6  | 5.9 | 3.5 | 2.9 | 1.2 | 22.6 | 14.6 | 2.6 | 20.5 | 0.0  | 1 |
| 51 | 2193 | Izyashchnyy                            | Bulgaria    | Saxa                      | 15.9 | 11.0 | 9.3  | 6.1 | 3.4 | 2.6 | 1.3 | 20.3 | 11.1 | 1.9 | 20.5 | 8.0  | 1 |
| 52 | 2196 | Local                                  | Lebanon     | Würzburg                  | 18.2 | 13.6 | 9.1  | 5.0 | 3.4 | 2.5 | 1.4 | 19.5 | 12.6 | 1.6 | 23.5 | 34.0 | 1 |
| 53 | 2197 | De Pontvil                             | France      | French Breakfast          | 15.9 | 14.3 | 9.8  | 5.8 | 5.9 | 2.1 | 2.7 | 23.4 | 16.1 | 2.8 | 20.5 | 0.0  | 2 |
| 54 | 2198 | Korall                                 | Czech       | Saxa                      | 20.4 | 14.3 | 10.3 | 6.9 | 4.4 | 2.1 | 2.1 | 20.1 | 12.5 | 1.7 | 20.5 | 4.0  | 1 |
| 55 | 2199 | De Pomtaise demi-long rose about blanc | France      | French Breakfast          | 22.5 | 14.6 | 11.5 | 8.1 | 7.1 | 2.1 | 3.4 | 31.7 | 18.1 | 3.1 | 20.5 | 12.0 | 2 |
| 56 | 2202 | Inca                                   | Netherlands | Saxa                      | 13.1 | 11.1 | 8.1  | 4.9 | 2.8 | 2.4 | 1.1 | 13.5 | 8.8  | 1.2 | 18.5 | 5.0  | 1 |

|    |      |                        |             |                  |      |      |      |     |     |     |     |      |      |     |      |      |   |
|----|------|------------------------|-------------|------------------|------|------|------|-----|-----|-----|-----|------|------|-----|------|------|---|
| 57 | 2210 | Saratovskiy            | Russia      | Saxa             | 22.6 | 21.2 | 13.1 | 8.1 | 3.3 | 3.5 | 0.9 | 46.1 | 25.6 | 3.6 | 22.5 | 80.0 | 2 |
| 58 | 2217 | Local                  | Afghanistan | Red Giant        | 26.6 | 17.0 | 13.6 | 8.6 | 9.6 | 1.7 | 5.6 | 55.4 | 24.7 | 2.8 | 32.5 | 12.0 | 2 |
| 59 | 2219 | Lubimi                 | Bulgaria    | Saxa             | 22.4 | 15.4 | 13.4 | 8.9 | 3.6 | 2.8 | 1.3 | 35.6 | 17.6 | 2.6 | 20.5 | 18.0 | 2 |
| 60 | 2220 | Local                  | Syria       | Saxa             | 22.6 | 16.1 | 11.9 | 7.9 | 5.7 | 2.5 | 2.3 | 41.5 | 22.1 | 0.9 | 32.5 | 15.0 | 1 |
| 61 | 2222 | Janosnapi              | Hungary     | Yellow           | 18.9 | 13.4 | 10.1 | 5.7 | 2.9 | 2.4 | 1.2 | 19.4 | 10.3 | 1.4 | 23.5 | 25.0 | 2 |
| 62 | 2228 | Revosa                 | Netherlands | Saxa             | 16.1 | 11.2 | 8.6  | 5.4 | 2.9 | 2.4 | 1.2 | 13.5 | 8.7  | 1.3 | 20.5 | 0.0  | 2 |
| 63 | 2234 | Sermino                | France      | French Breakfast | 20.8 | 13.7 | 11.1 | 7.1 | 6.7 | 1.9 | 3.5 | 25.9 | 12.2 | 2.0 | 20.5 | 0.0  | 1 |
| 64 | 2239 | Eroica                 | Netherlands | Saxa             | 19.6 | 15.4 | 11.5 | 6.7 | 3.1 | 2.4 | 1.3 | 26.6 | 11.9 | 1.5 | 22.5 | 22.0 | 2 |
| 65 | 2241 | Kokarde                | Netherlands | Saxa             | 19.7 | 15.6 | 11.1 | 7.2 | 3.9 | 2.7 | 1.4 | 27.5 | 14.3 | 1.1 | 21.5 | 40.0 | 2 |
| 66 | 2245 | Local                  | Argentina   | French Breakfast | 14.7 | 14.2 | 10.1 | 5.2 | 7.5 | 2.6 | 2.9 | 33.1 | 23.2 | 3.3 | 22.5 | 14.0 | 2 |
| 67 | 2246 | Amora                  | Netherlands | Saxa             | 21.6 | 22.2 | 14.2 | 8.2 | 3.9 | 3.3 | 1.2 | 42.2 | 22.0 | 0.9 | 20.5 | 70.0 | 2 |
| 68 | 2248 | Cherry Belle           | Netherlands | Saxa             | 16.5 | 14.5 | 9.5  | 6.5 | 3.3 | 2.4 | 1.4 | 30.0 | 15.5 | 2.5 | 30.0 | 0.0  | 2 |
| 69 | 2250 | Ronde helderrode broei | Netherlands | Saxa             | 21.2 | 19.1 | 12.4 | 8.1 | 3.6 | 2.7 | 1.3 | 33.0 | 17.9 | 1.8 | 21.5 | 50.0 | 2 |
| 70 | 2255 | Scarlet Knight         | USA         | Saxa             | 19.2 | 16.9 | 11.7 | 7.2 | 2.9 | 2.5 | 1.2 | 24.1 | 11.4 | 0.9 | 20.5 | 35.0 | 3 |
| 71 | 2260 | Local                  | Russia      | Red Giant        | 24.5 | 15.4 | 12.6 | 6.9 | 9.8 | 1.7 | 5.9 | 30.9 | 21.4 | 2.2 | 32.5 | 0.0  | 2 |
| 72 | 2283 | Mokhovskoy             | Russia      | Hailstone        | 20.3 | 14.4 | 13.3 | 7.5 | 3.4 | 2.8 | 1.2 | 38.8 | 19.3 | 2.1 | 30.5 | 0.0  | 0 |
| 73 | 2325 | Gyochel                | Moldova     | Saxa             | 20.1 | 15.1 | 11.1 | 6.7 | 3.5 | 2.5 | 1.4 | 30.9 | 16.2 | 2.3 | 20.5 | 22.0 | 2 |
| 74 | 2343 | Saxa                   | Iceland     | Saxa             | 14.7 | 12.2 | 8.5  | 4.9 | 3.5 | 2.5 | 1.4 | 19.1 | 13.6 | 2.3 | 19.5 | 19.0 | 1 |
| 75 | 2347 | Syla                   | Denmark     | White Icicle     | 21.2 | 17.2 | 11.4 | 7.1 | 8.4 | 2.1 | 4.1 | 47.1 | 18.6 | 3.0 | 24.5 | 0.0  | 0 |
| 76 | 2360 | Helios                 | Czech       | Yellow           | 17.9 | 12.4 | 11.1 | 6.1 | 3.7 | 2.8 | 1.3 | 27.1 | 16.7 | 3.0 | 23.5 | 27.0 | 2 |
| 77 | 2366 | Pernot                 | France      | French Breakfast | 18.9 | 17.2 | 10.0 | 6.6 | 4.8 | 2.0 | 2.5 | 19.4 | 10.8 | 1.4 | 20.5 | 13.0 | 2 |
| 78 | 2369 | Flevo                  | Netherlands | Saxa             | 22.4 | 16.1 | 13.1 | 7.4 | 4.5 | 2.9 | 1.6 | 38.2 | 17.9 | 2.7 | 20.5 | 43.0 | 2 |

|    |      |                              |                 |                                 |      |      |      |     |     |     |     |      |      |     |      |      |   |
|----|------|------------------------------|-----------------|---------------------------------|------|------|------|-----|-----|-----|-----|------|------|-----|------|------|---|
| 79 | 2371 | Safir                        | Denmark         | French Breakfast                | 12.8 | 10.6 | 8.1  | 4.8 | 4.8 | 1.8 | 2.7 | 12.4 | 9.8  | 0.5 | 20.5 | 11.0 | 2 |
| 80 | 2375 | Rund halbrød<br>halbweiss    | Denmark         | Pink-red<br>with a<br>White Tip | 24.5 | 19.1 | 13.0 | 7.6 | 3.3 | 3.1 | 1.1 | 42.9 | 15.9 | 2.4 | 20.5 | 0.0  | 3 |
| 81 | 2379 | No name                      | Lebanon         | White<br>Icicle                 | 24.1 | 18.0 | 13.2 | 8.9 | 8.5 | 2.1 | 4.1 | 46.8 | 20.2 | 1.6 | 25.5 | 4.0  | 2 |
| 82 | 2380 | Rund rosen<br>rod Vitspetsig | Sweden          | Pink-red<br>with a<br>White Tip | 23.2 | 14.9 | 10.9 | 8.2 | 3.1 | 2.6 | 1.2 | 33.3 | 13.7 | 1.8 | 20.5 | 10.0 | 2 |
| 83 | 2383 | Jegcsap                      | Hungary         | White<br>Icicle                 | 22.9 | 19.5 | 13.1 | 8.7 | 7.9 | 2.1 | 3.9 | 40.6 | 22.9 | 3.2 | 24.5 | 0.0  | 2 |
| 84 | 2393 | Crimson Giant                | Canada          | Pink-red<br>with a<br>White Tip | 24.9 | 13.9 | 11.3 | 7.7 | 2.9 | 2.6 | 1.1 | 32.9 | 12.8 | 1.7 | 20.5 | 18.0 | 2 |
| 85 | 2394 | Nobo Chind-<br>Criollo       | Peru            | Saxa                            | 18.6 | 14.6 | 10.5 | 6.5 | 4.5 | 3.1 | 1.5 | 28.0 | 18.3 | 3.0 | 28.5 | 0.0  | 2 |
| 86 | 2402 | Rabanito                     | Argentina       | Pink-red<br>with a<br>White Tip | 21.1 | 16.3 | 10.8 | 5.9 | 3.9 | 3.1 | 1.3 | 36.9 | 22.4 | 2.9 | 20.5 | 55.0 | 1 |
| 87 | 2404 | Bov                          | Netherland<br>s | Saxa                            | 14.1 | 9.8  | 8.1  | 4.8 | 2.9 | 2.1 | 1.4 | 11.6 | 6.9  | 0.7 | 20.5 | 0.0  | 2 |
| 88 | 2405 | Minitas                      | Netherland<br>s | Saxa                            | 14.9 | 11.9 | 9.2  | 5.8 | 2.6 | 2.6 | 1.0 | 15.0 | 8.8  | 1.7 | 20.5 | 0.0  | 2 |
| 89 | 2408 | Notar                        | Netherland<br>s | Saxa                            | 14.1 | 11.0 | 8.8  | 5.2 | 2.9 | 2.8 | 1.1 | 15.9 | 9.9  | 1.7 | 20.5 | 0.0  | 2 |
| 90 | 2415 | Local                        | Turkey          | Saxa                            | 15.2 | 15.0 | 9.0  | 5.9 | 3.1 | 2.9 | 1.1 | 21.1 | 14.9 | 2.1 | 20.5 | 11.0 | 1 |
| 91 | 2424 | Local                        | France          | White<br>Icicle                 | 29.8 | 22.2 | 14.4 | 9.1 | 5.1 | 1.9 | 2.7 | 54.1 | 14.9 | 1.2 | 24.5 | 0.0  | 0 |
| 92 | 2441 | Rocco                        | Netherland<br>s | Saxa                            | 15.4 | 12.2 | 8.9  | 5.0 | 3.7 | 3.1 | 1.2 | 32.2 | 21.6 | 3.3 | 28.5 | 0.0  | 2 |
| 93 | 2445 | Slavia                       | Czech           | French<br>Breakfast             | 19.6 | 14.3 | 11.9 | 7.4 | 9.4 | 2.2 | 4.3 | 30.4 | 20.9 | 3.2 | 23.5 | 11.0 | 1 |
| 94 | 2450 | Sparcler                     | Japan           | Saxa                            | 20.3 | 15.6 | 12.4 | 6.3 | 4.1 | 3.2 | 1.2 | 30.5 | 17.7 | 2.6 | 28.5 | 0.0  | 2 |
| 95 | 2451 | Flamingo<br>rozovyy          | Russia          | Pinkie                          | 20.3 | 14.1 | 10.4 | 7.3 | 4.1 | 2.7 | 1.5 | 30.9 | 16.9 | 3.2 | 20.5 | 0.0  | 2 |
| 96 | 2453 | Estella                      | Netherland<br>s | Saxa                            | 13.4 | 13.3 | 7.9  | 5.6 | 3.5 | 3.4 | 1.0 | 26.1 | 19.7 | 3.2 | 28.5 | 0.0  | 2 |
| 97 | 2466 | Pernot                       | Denmark         | French<br>Breakfast             | 17.4 | 16.6 | 8.9  | 5.8 | 8.6 | 2.2 | 3.9 | 25.0 | 16.5 | 2.5 | 23.5 | 10.0 | 2 |
| 98 | 2476 | Early scarlet<br>globe       | USA             | Scarlet<br>globe                | 24.0 | 16.1 | 12.2 | 8.4 | 4.2 | 2.6 | 1.6 | 38.8 | 16.5 | 1.8 | 20.5 | 25.0 | 2 |

|     |          |                     |             |                  |      |      |      |     |      |     |     |      |      |     |       |      |   |
|-----|----------|---------------------|-------------|------------------|------|------|------|-----|------|-----|-----|------|------|-----|-------|------|---|
| 99  | 2550     | Duro                | Russia      | Saxa             | 22.3 | 15.6 | 11.4 | 7.8 | 3.4  | 2.9 | 1.2 | 39.3 | 17.4 | 2.5 | 28.5  | 25.0 | 2 |
| 100 | vr. 3217 | 18 days             | Russia      | French Breakfast | 20.4 | 15.6 | 12.9 | 7.8 | 7.9  | 2.2 | 3.6 | 41.1 | 20.8 | 2.4 | 28.5  | 40.0 | 2 |
| 101 | vr. 3362 | Riesenbutter        | Russia      | Saxa             | 17.6 | 16.2 | 11.4 | 6.1 | 3.8  | 3.4 | 1.1 | 30.4 | 18.2 | 2.7 | 24.5  | 10.0 | 2 |
| 102 | vr. 3452 | Zhara               | Russia      | Saxa             | 21.3 | 17.4 | 13.8 | 7.4 | 3.4  | 3.1 | 1.1 | 42.7 | 15.7 | 1.6 | 28.5  | 55.0 | 2 |
| 103 | vr. 3454 | Aleks               | Russia      | Saxa             | 20.7 | 16.8 | 13.2 | 7.2 | 3.8  | 3.1 | 1.2 | 41.8 | 16.4 | 2.1 | 28.5  | 60.0 | 2 |
| 104 | vr. 3521 | Sprinter            | Russia      | Saxa             | 20.4 | 17.2 | 13.0 | 5.8 | 4.1  | 3.2 | 1.2 | 33.4 | 18.3 | 2.4 | 24.5  | 20.0 | 2 |
| 105 | vr. 3529 | Faraon              | Russia      | Saxa             | 22.2 | 15.7 | 13.4 | 6.3 | 4.1  | 2.9 | 1.4 | 42.1 | 16.6 | 1.8 | 24.5  | 25.0 | 2 |
| 106 | vr. 2948 | French Breakfast    | Lithuania   | French Breakfast | 19.7 | 16.1 | 10.5 | 6.2 | 5.0  | 2.0 | 2.5 | 21.0 | 11.1 | 1.9 | 21.5  | 0.0  | 2 |
| 107 | vr. 2961 | Presto              | Russia      | Saxa             | 17.9 | 15.3 | 11.1 | 6.2 | 3.7  | 3.4 | 1.1 | 35.5 | 18.8 | 2.7 | 28.5  | 75.0 | 2 |
| 108 | vr. 3161 | Viola               | Russia      | Purple           | 16.6 | 14.2 | 8.8  | 6.3 | 3.8  | 3.3 | 1.2 | 25.1 | 14.5 | 2.3 | 24.5  | 0.0  | 0 |
| 109 | vr. 3194 | Gusar               | Russia      | Saxa             | 18.8 | 16.3 | 12.2 | 6.3 | 3.3  | 2.9 | 1.1 | 30.3 | 16.4 | 2.3 | 28.5  | 20.0 | 2 |
| 110 | vr. 3221 | Champion            | Russia      | Saxa             | 18.7 | 16.8 | 12.6 | 8.2 | 4.2  | 2.8 | 1.5 | 40.5 | 17.6 | 2.3 | 28.5  | 70.0 | 2 |
| 111 | vr. 3447 | Duet                | Russia      | French Breakfast | 15.3 | 12.6 | 7.6  | 5.6 | 5.0  | 2.2 | 2.3 | 27.3 | 14.1 | 2.5 | 30.0  | 0.0  | 2 |
| 112 | n/n      | Octava              | Russia      | Hailstone        | 20.6 | 22.1 | 15.8 | 8.4 | 4.3  | 3.5 | 1.2 | 40.8 | 21.1 | 2.3 | 25.0  | 0.0  | 0 |
|     |          | Radish              |             |                  |      |      |      |     |      |     |     |      |      |     |       |      |   |
| 113 | 1887     | Chensubanzhy        | South Korea | Unknown          | 23.9 | 28.9 | 18.2 | 6.6 | 9.0  | 1.2 | 7.5 | 40.4 | 6.0  | 0.0 | >42.0 | 0.0  | 2 |
| 114 | 1941     | Bansei sacuragima   | Japan       | Sakurajima       | 24.3 | 27.2 | 17.6 | 6.6 | 6.6  | 2.2 | 3.0 | 35.8 | 10.4 | 0.4 | >42.0 | 0.0  | 2 |
| 115 | 1948     | Miashige soluto     | Japan       | Miashige         | 21.1 | 26.2 | 17.3 | 7.7 | 9.0  | 1.4 | 6.4 | 32.6 | 9.3  | 0.2 | >42.0 | 0.0  | 2 |
| 116 | vr. 2400 | Himani              | India       | Unknown          | 24.3 | 28.8 | 17.0 | 7.3 | 10.4 | 2.1 | 5.0 | 56.8 | 32.4 | 1.5 | 42.0  | 0.0  | 2 |
| 117 | bp.3337  | Peterburgskiy       | Russia      | Miashige         | 22.3 | 26.9 | 16.1 | 8.2 | 11.2 | 2.8 | 4.0 | 90.8 | 47.2 | 2.5 | 42.0  | 0.0  | 1 |
| 118 | n/n      | White Icicle Daikon | Canada      | Minowase         | 21.7 | 28.4 | 16.6 | 7.6 | 10.3 | 1.5 | 6.9 | 37.6 | 12.4 | 0.5 | >42.0 | 0.0  | 2 |

\* Degree of leaf pubescence: 0 – no pubescence; 1 – low; 2 – medium; 3 – strong.
